# Supplementary material
Source: publisher figshare collection journal article supplement (https://geolsoc.figshare.com/ndownloader/files/28380094)
Supplement: Supplementary file 1 [file 28380094]

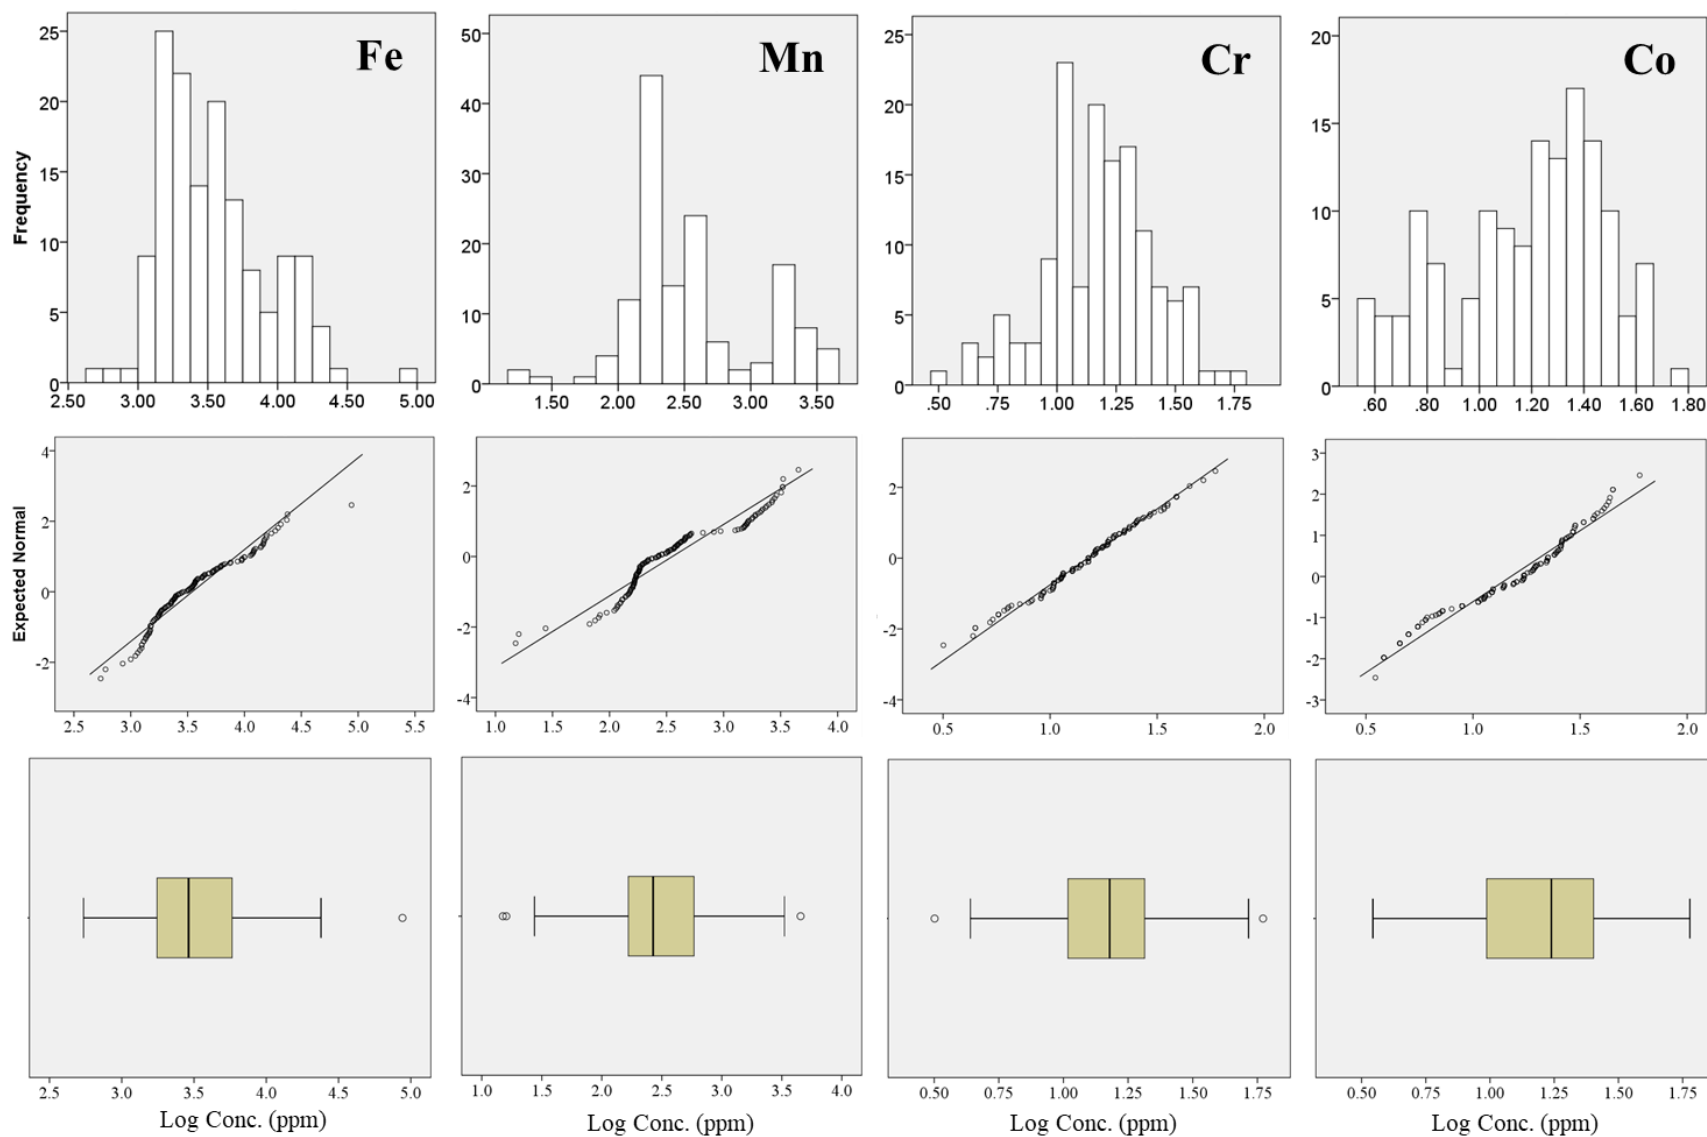

**Fig. S1** (supplementary). Histograms, Quantile-Quantile plots, and Box plots of logarithmic concentrations of Fe, Mn, Cr, and Co in stream sediments of the west-central Sinai district.

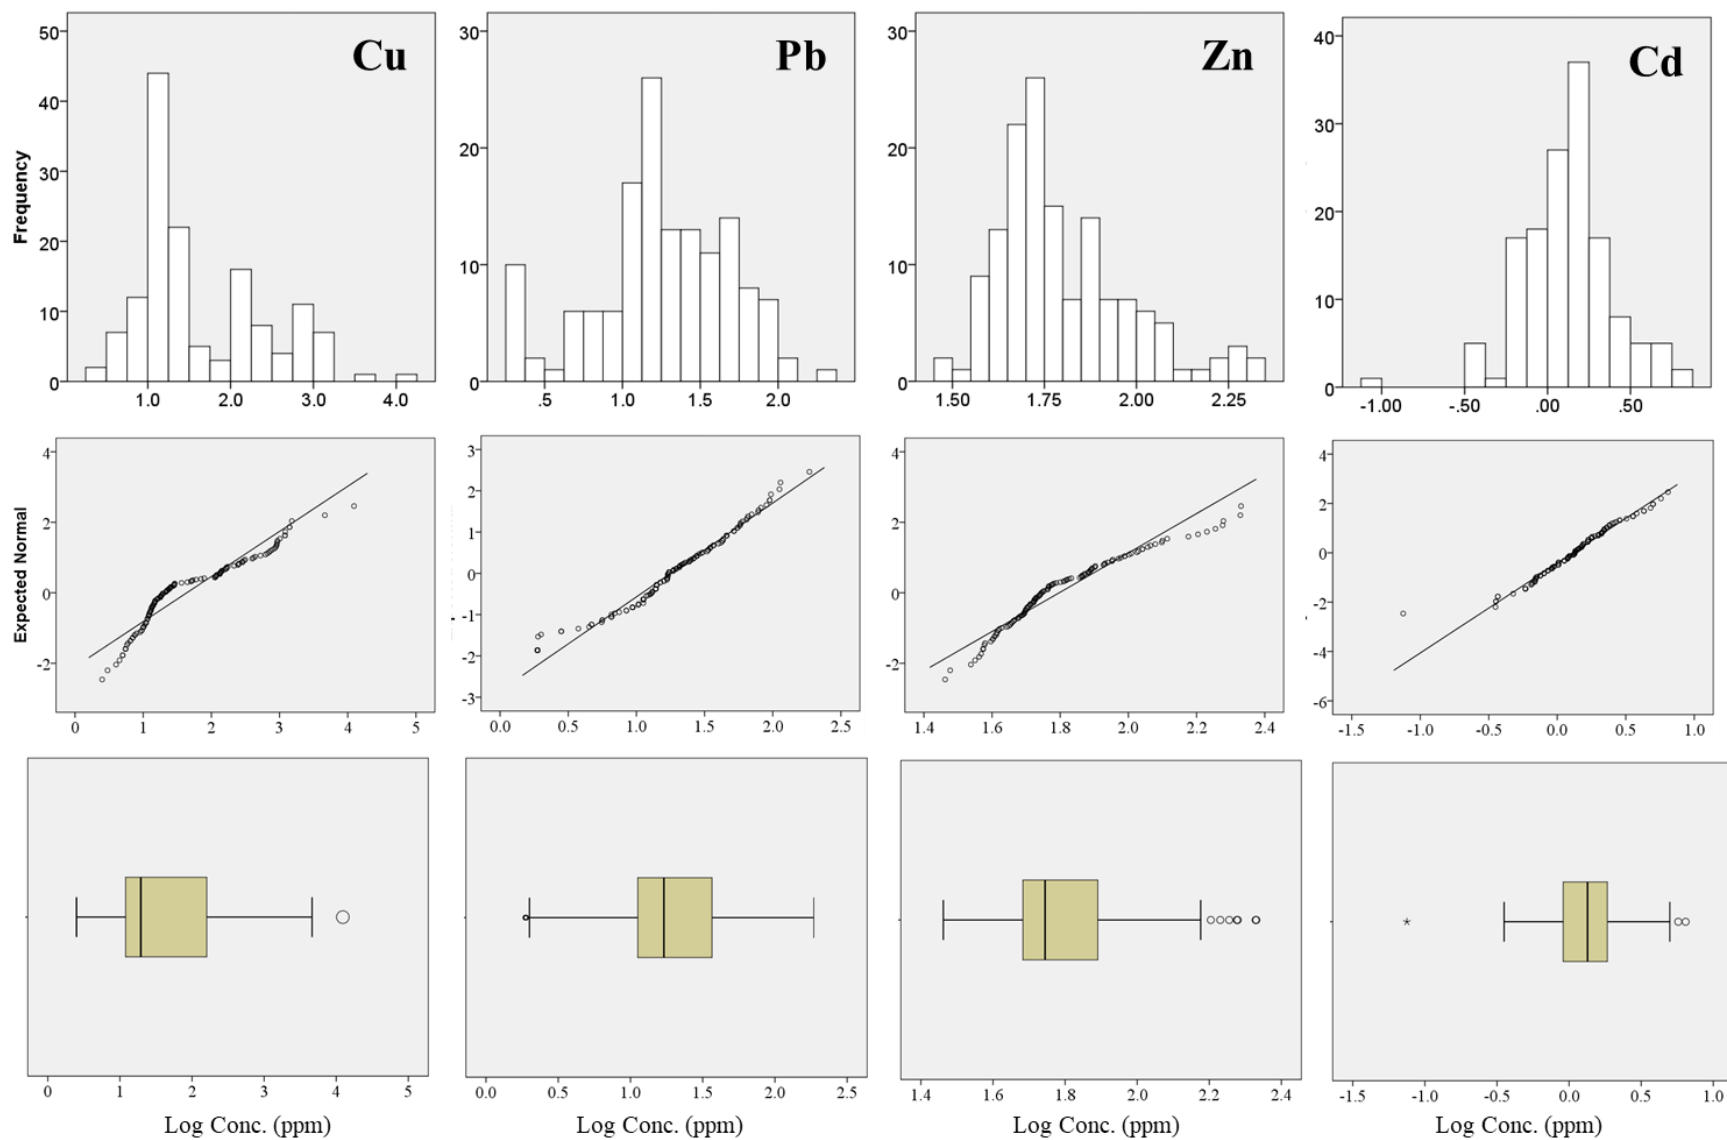

**Fig. S2** (supplementary). Histograms, Quantile-Quantile plots, and Box plots of logarithmic concentrations of Cu, Pb, Zn, and Cd in stream sediments of the west-central Sinai district.
